# Supplementary material for: Effect on Schottky behaviour of 1D coordination polymers by altering para-substituents on benzoate ligands
Source: Royal Society of Chemistry journal article supplement (doi:10.1039/c8nj02504e), 2018-01-01
Supplement: c8nj02504e1.pdf [file c8nj02504e1.pdf]

## Effect on Schottky behavior of 1D coordination polymers by altering para-substituent on the benzoate ligands

Sakhiul Islam,<sup>a</sup> Joydeep Datta,<sup>b</sup> FarukAhmed,<sup>a</sup> BasudebDutta,<sup>a</sup> Sanobar Naaz,<sup>a</sup> Partha Pratim Ray,<sup>\*b</sup> and Mohammad Hedayetullah Mir<sup>\*a</sup>

<sup>a</sup>Department of Chemistry, Aliah University, New Town, Kolkata 700 156, India.

<sup>b</sup>Department of Physics, Jadavpur University, Jadavpur, Kolkata 700 032, India.

To whom correspondence should be addressed. E-mails: [partha@phys.jdvu.ac.in](mailto:partha@phys.jdvu.ac.in) and [chmmir@gmail.com](mailto:chmmir@gmail.com)

### Supporting Information

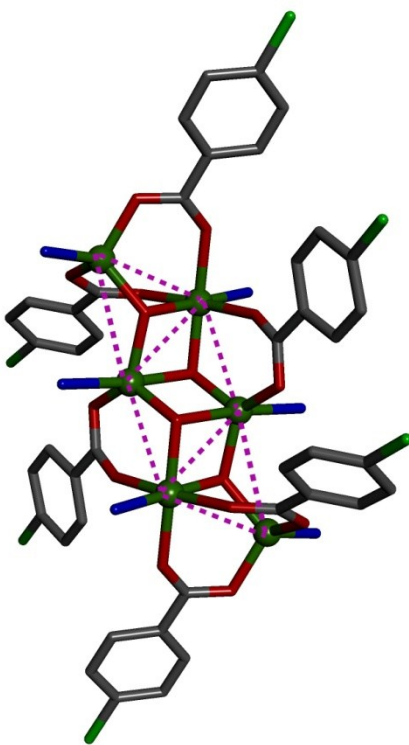

**Fig. S1** A view of chair-like hexagonal {Zn<sub>6</sub>} unit in compound **1**.

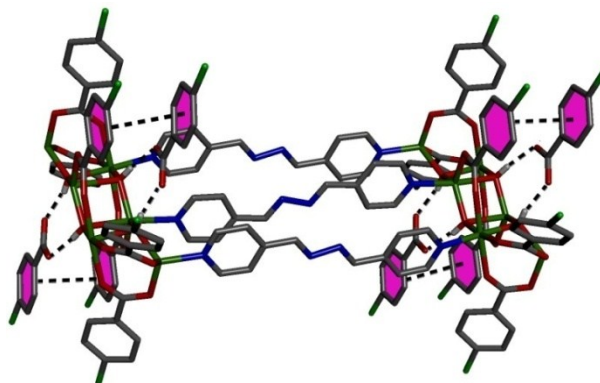

**Fig. S2** Hydrogen bonding and  $\pi \cdots \pi$  interactions between lattice 4-clba and  $\{Zn_6\}$  unit in compound **1**.

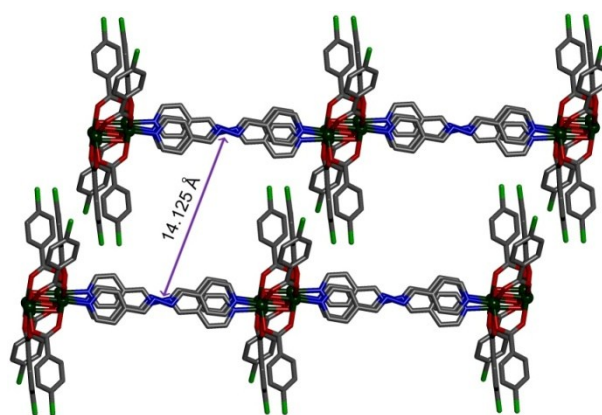

(a)

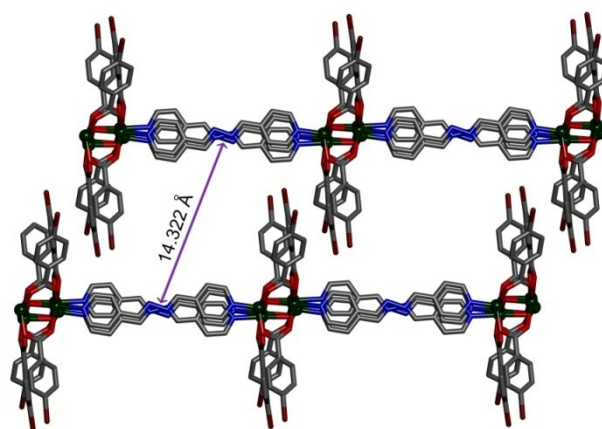

(b)

**Fig. S3** The perspective view of compound (a) **1** and (b) **2** showing the distance between the adjacent 1D chains.

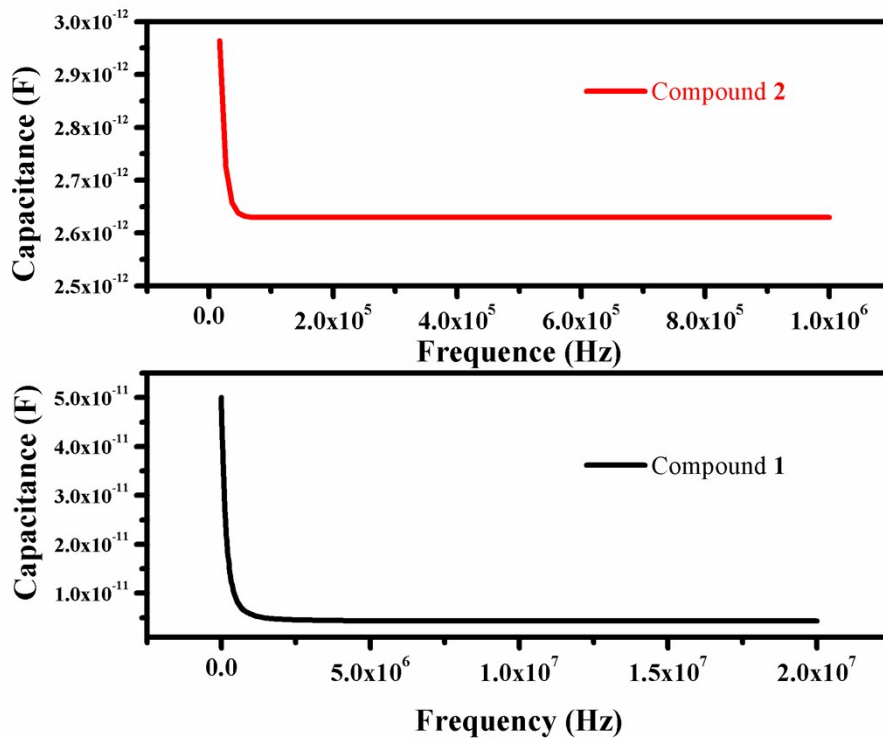

**Fig. S4** Capacitance–frequency plot for the determination of dielectric constant.

Here, Fig. S4 illustrates that the capacitance is saturated at high frequency. Using this saturated capacitance, we have calculated the relative permittivity with the help of the following relation:

$$\epsilon_r = C_{\text{sat}}L/\epsilon_0A \quad (1)$$

where  $C_{\text{sat}}$  is the saturated capacitance at high frequency,  $L$  is the length,  $\epsilon_0$  is the permittivity at free space and  $A$  is the effective area of the film of the compounds.

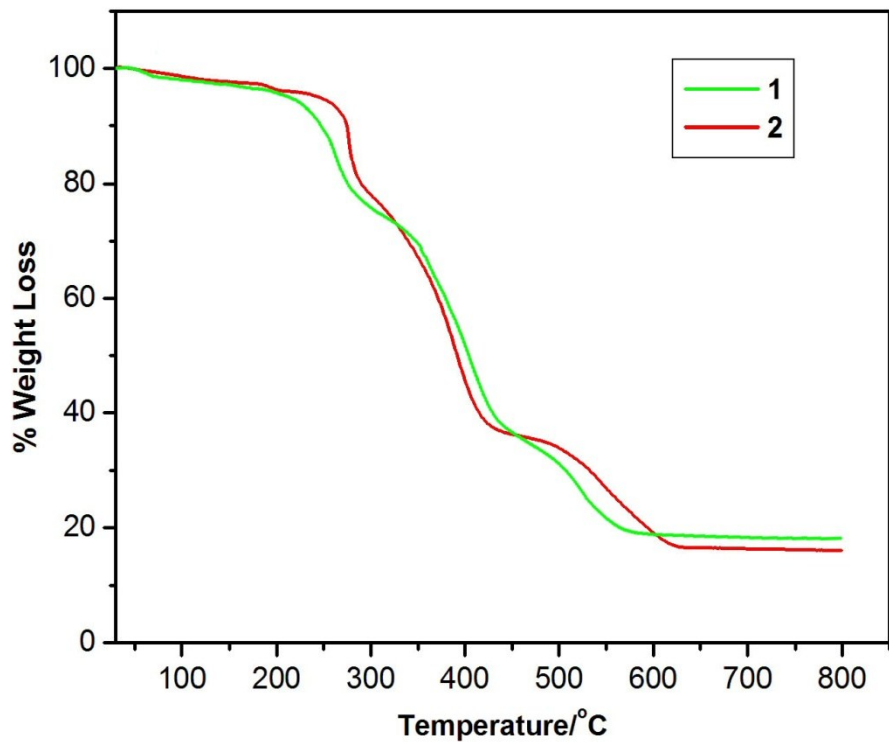

Fig. S5 TGA plot of compound 1 (green) and 2 (red) measured under N<sub>2</sub> atmosphere.

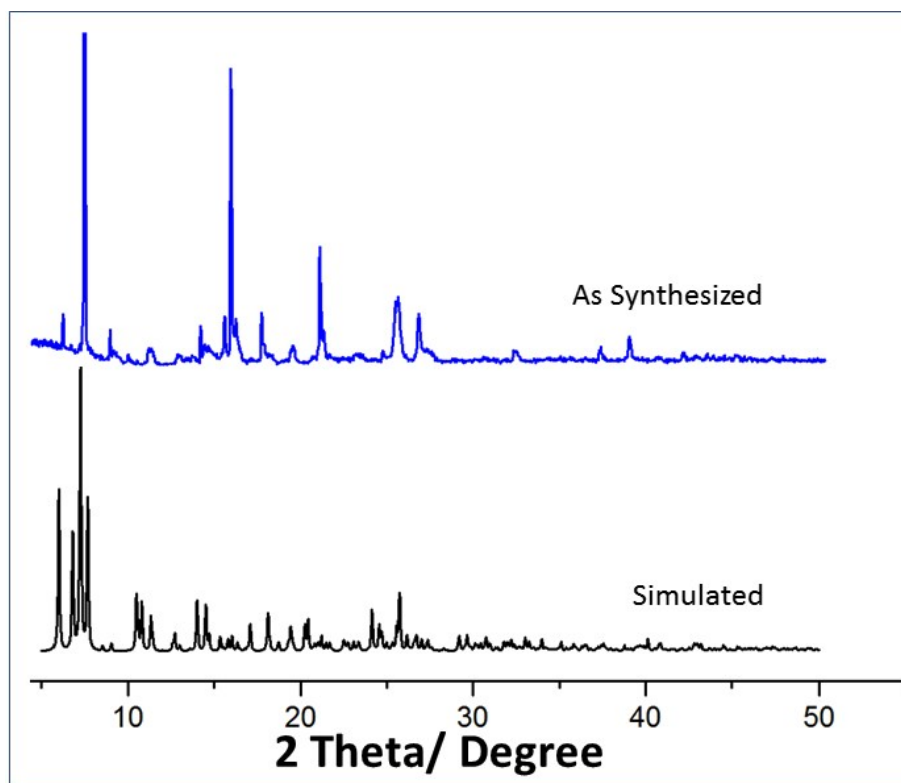

Fig. S6 PXRD patterns of simulated 1 (black) and as-synthesized 1 (blue).

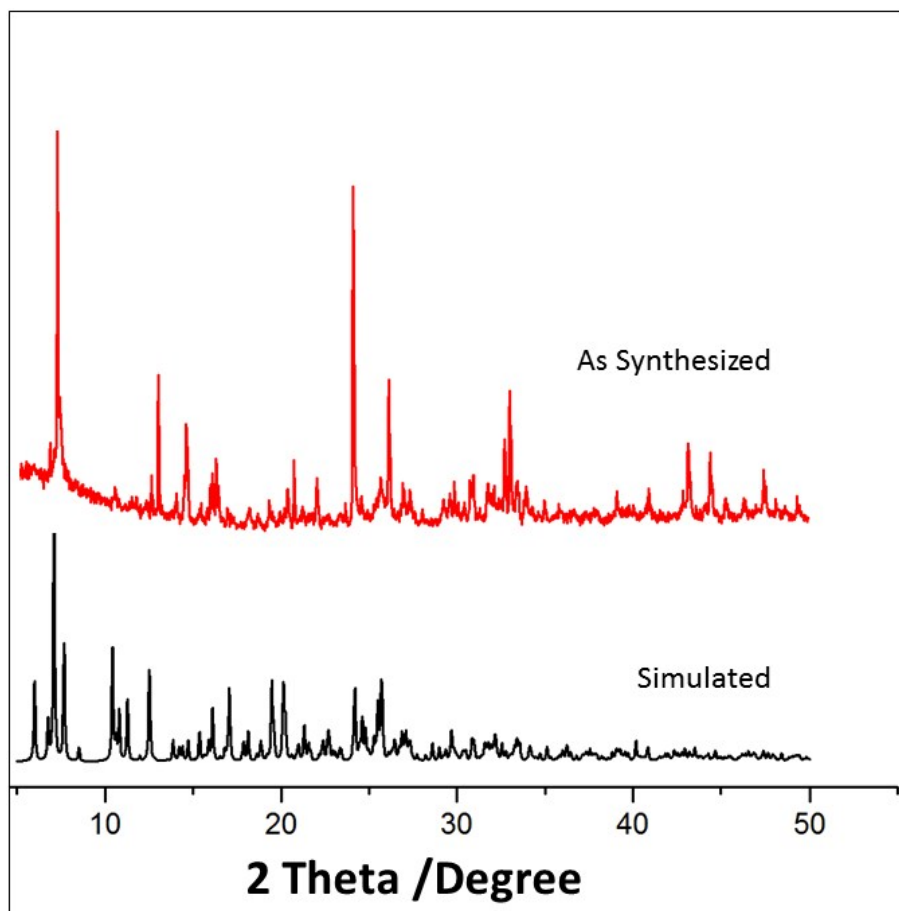

**Fig. S7** PXRD patterns of simulated **2** (black) and as-synthesized **2** (red).

**Table S1** Crystal data and refinement parameters for compound **1** and **2**

| Formula                                                                    | C <sub>93</sub> H <sub>69</sub> Cl <sub>8</sub> N <sub>12</sub> O <sub>21</sub> Zn <sub>6</sub> ( <b>1</b> ) | C <sub>93</sub> H <sub>66</sub> Br <sub>8</sub> N <sub>12</sub> O <sub>21</sub> Zn <sub>6</sub> ( <b>2</b> ) |
|----------------------------------------------------------------------------|--------------------------------------------------------------------------------------------------------------|--------------------------------------------------------------------------------------------------------------|
| Fw                                                                         | 2366.54                                                                                                      | 2719.12                                                                                                      |
| cryst syst                                                                 | Triclinic                                                                                                    | Triclinic                                                                                                    |
| space group                                                                | <i>P</i> $\bar{1}$                                                                                           | <i>P</i> $\bar{1}$                                                                                           |
| <i>a</i> (Å)                                                               | 12.0190(3)                                                                                                   | 12.0085(7)                                                                                                   |
| <i>b</i> (Å)                                                               | 14.1254(2)                                                                                                   | 14.3222(8)                                                                                                   |
| <i>c</i> (Å)                                                               | 16.0929(4)                                                                                                   | 16.2643(9)                                                                                                   |
| $\alpha$ (deg)                                                             | 109.0940(17)                                                                                                 | 110.576(2)                                                                                                   |
| $\beta$ (deg)                                                              | 100.0158(19)                                                                                                 | 100.003(2)                                                                                                   |
| $\gamma$ (deg)                                                             | 98.6977(16)                                                                                                  | 98.071(2)                                                                                                    |
| <i>V</i> (Å <sup>3</sup> )                                                 | 2478.07(9)                                                                                                   | 2516.7(2)                                                                                                    |
| <i>Z</i>                                                                   | 1                                                                                                            | 1                                                                                                            |
| <i>D</i> <sub>calcd</sub> (g/cm <sup>3</sup> )                             | 1.586                                                                                                        | 1.794                                                                                                        |
| $\mu$ (mm <sup>-1</sup> )                                                  | 4.218                                                                                                        | 4.656                                                                                                        |
| $\lambda$ (Å)                                                              | 1.54184                                                                                                      | 0.71073                                                                                                      |
| data[ <i>I</i> > 2 $\sigma$ ( <i>I</i> )]/params                           | 8846/741                                                                                                     | 8340/643                                                                                                     |
| GOF on <i>F</i> <sup>2</sup>                                               | 1.025                                                                                                        | 1.090                                                                                                        |
| final <i>R</i> indices[ <i>I</i> > 2 $\sigma$ ( <i>I</i> )] <sup>a,b</sup> | <i>R</i> 1 = 0.0436<br><i>wR</i> 2 = 0.1230                                                                  | <i>R</i> 1 = 0.0704<br><i>wR</i> 2 = 0.1564                                                                  |

$$^a R1 = \sum ||F_o| - |F_c|| / \sum |F_o|, ^b wR2 = [\sum w(F_o^2 - F_c^2)^2 / \sum w(F_o^2)^2]^{1/2}$$

**Table S2** Selected bond lengths and bond angles in **1**

|                     |            |                     |            |
|---------------------|------------|---------------------|------------|
| Zn(1)-O(22)         | 1.997(2)   | Zn(1)-O(45)b        | 2.2091(19) |
| Zn(2)-O(31)b        | 2.122(2)   | Zn(3)-O(41)         | 1.942(2)   |
| Zn(1)-O(44)         | 2.000(2)   | Zn(2)-O(21)         | 2.151(2)   |
| Zn(2)-(42)b         | 2.201(2)   | Zn(3)-O(44)         | 1.9301(19) |
| Zn(1)-O(45)         | 1.968(2)   | Zn(2)-O(45)         | 2.0318(19) |
| Zn(2)-O(44)b        | 2.0940(19) | Zn(3)-N(46)         | 2.031(2)   |
| Zn(1)-N(62)         | 2.197(2)   | Zn(2)-N(56)a        | 2.101(2)   |
| Zn(3)-O(32)         | 1.942(2)   | O(22)-Zn(1)-O(44)   | 125.92(9)  |
| O(22)-Zn(1)-O(45)b  | 88.39(8)   | O(44)-Zn(1)-O(45)b  | 81.53(7)   |
| O(22)-Zn(1)-O(45)   | 126.51(9)  | O(44)-Zn(1)-O(45)   | 105.19(8)  |
| O(45)-Zn(1)-N(62)   | 101.99(9)  | O(22)-Zn(1)-N(62)   | 89.52(9)   |
| O(44)-Zn(1)-N(62)   | 94.80(8)   | O(45)-Zn(1)-O(45)b  | 84.13(8)   |
| N(62)-Zn(1)-O(45)b  | 173.56(8)  | O(21)-Zn(2)-O(31)b  | 84.98(9)   |
| O(45)-Zn(2)-N(56)a  | 96.58(9)   | O(45)-Zn(2)-O(44)b  | 83.69(7)   |
| N(56)a-Zn(2)-O(44)b | 177.99(9)  | O(42)b-Zn(2)-O(44)b | 86.39(8)   |
| O(32)-Zn(3)-N(46)   | 101.99(10) | O(44)-Zn(3)-N(46)   | 112.93(9)  |
| O(21)-Zn(2)-O(45)   | 89.57(9)   | O(21)-Zn(2)-O(42)b  | 176.09(9)  |
| O(45)-Zn(2)-O(31)b  | 172.49(9)  | N(56)a-Zn(2)-O(31)b | 88.75(9)   |
| O(31)b-Zn(2)-O(42)b | 97.38(9)   | O(32)-Zn(3)-O(41)   | 121.68(10) |
| O(41)-Zn(3)-O(44)   | 106.75(9)  | O(21)-Zn(2)-N(56)a  | 91.56(10)  |
| O(21)-Zn(2)-O(44)b  | 90.44(9)   | O(45)-Zn(2)-O(42)b  | 87.80(8)   |
| N(56)a-Zn(2)-O(42)b | 91.62(9)   | O(31)b-Zn(2)-O(44)b | 91.18(8)   |
| O(32)-Zn(3)-O(44)   | 107.69(9)  | O(41)-Zn(3)-N(46)   | 105.90(9)  |

Symmetry Code: a = -x, 1-y, 1-z; 1-x, 2-y, 2-z

**Table S3** Selected bond lengths and bond angles in **2**

|                   |           |                   |           |
|-------------------|-----------|-------------------|-----------|
| Zn(2)-O00D        | 1.991(6)  | Zn(2)-O7          | 2.000(5)  |
| Zn(3)-O009        | 2.038(5)  | Zn(3)-O00F        | 2.154(6)  |
| Zn(3)-O7a         | 2.098(5)  | Zn(3)-N00Jb       | 2.110(7)  |
| Zn(5)-O7          | 1.925(5)  | Zn(5)-N1          | 2.031(6)  |
| Zn(2)-N2          | 2.192(7)  | Zn(3)-O00Ca       | 2.196(6)  |
| Zn(5)-O00A        | 1.942(6)  | Zn(2)-O009        | 1.969(5)  |
| Zn(2)-O009a       | 2.210(5)  | Zn(3)-O00Ea       | 2.133(6)  |
| Zn(5)-O00B        | 1.939(6)  | O009-Zn(2)-O00D   | 126.5(2)  |
| O009-Zn(2)-O009a  | 84.6(2)   | O00D-Zn(2)-O009a  | 87.7(2)   |
| N2-Zn(2)-O009a    | 173.8(2)  | O009-Zn(2)-O7     | 105.2(2)  |
| O00D-Zn(2)-O7     | 125.9(2)  | O7-Zn(2)-N2       | 95.2(2)   |
| O009-Zn(3)-O00F   | 89.4(2)   | O009-Zn(2)-N2     | 101.5(2)  |
| O00D-Zn(2)-N2     | 89.6(3)   | O7-Zn(2)-O009a    | 81.98(19) |
| O009-Zn(3)-O00Ca  | 88.0(2)   | O009-Zn(3)-O00Ea  | 172.6(2)  |
| O00F-Zn(3)-O00Ca  | 176.5(2)  | O00F-Zn(3)-N00Jb  | 91.4(3)   |
| O00Ca-Zn(3)-N00Jb | 91.2(3)   | O7a-Zn(3)-N00Jb   | 178.1(3)  |
| O00A-Zn(5)-N1     | 102.0(3)  | O7-Zn(5)-N1       | 113.0(3)  |
| O009-Zn(3)-O7a    | 83.94(19) | O00F-Zn(3)-O00Ea  | 85.3(3)   |
| O00Ca-Zn(3)-O00Ea | 97.1(3)   | O00Ea-Zn(3)-O7a   | 91.0(2)   |
| O00A-Zn(5)-O00B   | 122.0(3)  | O00B-Zn(5)-O7     | 107.2(2)  |
| O009-Zn(3)-N00Jb  | 96.6(2)   | O00F-Zn(3)-O7a    | 90.5(2)   |
| O00Ca-Zn(3)-O7a   | 86.9(2)   | O00Ea-Zn(3)-N00Jb | 88.7(2)   |
| O00A-Zn(5)-O7     | 107.2(3)  | O00B-Zn(5)-N1     | 105.5(3)  |

Symmetry Code: a = 1-x, -y, -z; b = 2-x, 1-y, 1-z



**Table S4** Hydrogen bonding interactions of compound **1** and **2**.

| Compound                   | D-H···A             | D-H (Å)             | H···A (Å) | D···A (Å) | <D-H···A (°) |
|----------------------------|---------------------|---------------------|-----------|-----------|--------------|
| <b>1</b>                   | O(44)-H(44)···O(12) | 0.71(5)             | 1.93(5)   | 2.625(4)  | 166(5)       |
|                            | O(45)-H(45)···O(11) | 0.81(5)             | 2.11(5)   | 2.899(3)  | 163(5)       |
|                            | C(5)-H(5)···O(1)    | 0.86(6)             | 2.55(6)   | 3.176(12) | 131(5)       |
|                            | C(5)-H(5)···O(11)   | 0.86(6)             | 2.47(6)   | 2.823(6)  | 105(5)       |
|                            | C(15)-H(15)···O(21) | 0.95(4)             | 2.39(4)   | 2.765(4)  | 103(3)       |
|                            | C(19)-H(19)···O(22) | 0.84(5)             | 2.49(5)   | 2.804(5)  | 104(4)       |
|                            | C(25)-H(25)···O(32) | 0.93                | 2.42      | 2.744(5)  | 100          |
|                            | C(51)-H(51)···O(12) | 0.87(5)             | 2.52(4)   | 3.231(4)  | 140(4)       |
|                            | C(57)-H(57)···O(42) | 0.93                | 2.50      | 3.110(4)  | 124          |
|                            | C(58)-H(58)···O(1)  | 0.93                | 2.49      | 2.992(11) | 114          |
|                            | C(61)-H(61)···O(21) | 0.93                | 2.52      | 3.056(4)  | 117          |
|                            | C(63)-H(63)···O(11) | 0.92(5)             | 2.47(5)   | 3.377(4)  | 171(3)       |
|                            | C(67)-H(67)···O(22) | 0.92(4)             | 2.40(4)   | 3.035(4)  | 126(4)       |
|                            | <b>2</b>            | O(2)-H(2A)···O(00K) | 0.82      | 1.94      | 2.71(3)      |
| C(00T)-H(00T)···O(00H)     |                     | 0.93                | 2.51      | 3.247(11) | 137          |
| C(00V)-H(00V)···O(00K)     |                     | 0.93                | 2.45      | 3.371(13) | 171          |
| C(00W)-<br>H(00W)···O(00D) |                     | 0.93                | 2.45      | 3.021(11) | 119          |
| C(017)-H(017)···O(00F)     |                     | 0.93                | 2.51      | 3.055(10) | 118          |
| C(01A)-H(01A)···O(00C)     |                     | 0.93                | 2.49      | 3.089(11) | 123          |
| C(01F)-H(01F)···O(2)       |                     | 0.93                | 2.52      | 3.01(3)   | 113          |
| C(01T)-H(01T)···O(00A)     |                     | 0.93                | 2.41      | 2.730(14) | 100          |
| C(01W)-H(01W)···O(2)       |                     | 0.93                | 2.46      | 3.12(3)   | 128          |

**Table S5** Halogen bonding interactions of compounds **1** and **2**

| Compound | D-H···A               | D-H (Å) | H···A (Å) | D···A (Å) | <D-H···A (°) |
|----------|-----------------------|---------|-----------|-----------|--------------|
| <b>1</b> | C(47)-H(47)···Cl(23)  | 0.97(5) | 2.79(5)   | 3.489(3)  | 130(4)       |
| <b>2</b> | C(00X)-H(00X)···Br(2) | 0.93    | 2.81      | 3.575(9)  | 141          |

**Table S6**  $\pi\cdots\pi$  interactions in **1** and **2**

| Compound | Ring(i) → Ring(j) | Distance between the (i,j) ring centroids (Å) in the crystal |
|----------|-------------------|--------------------------------------------------------------|
| <b>1</b> | R(1)→R(2)         | 3.680                                                        |
|          | R(2)→R(3)         | 3.900                                                        |
| <b>2</b> | R(4)→R(5)         | 3.686                                                        |
|          | R(5)→R(6)         | 3.857                                                        |

R(j) denotes the j-th ring: R(1) = N(46)/C(51)/C(50)/C(49)/C(48)/C(47);

R(2) = N(62)/C(63)/C(64)/C(65)/C(66)/C(67);

R(3) = N(56)/C(57)/C(58)/C(59)/C(60)/C(61);

R(4) = N(1)/C(00T)/C(013)/C(00P)/C(00Y)/C(00X);

R(5) = N(2)/C(00V)/C(01E)/C(010)/C(015)/C(00W)

R(6) = N(00J)/C(01A)/C(01F)/C(00U)/C(018)/C(017)

**Table S7.** Table for comparing conductivity data.

| Sample Name                                                                                                                                           | Electrical conductivity                 | Reference         |
|-------------------------------------------------------------------------------------------------------------------------------------------------------|-----------------------------------------|-------------------|
| [Cd(4-bpd)(SCN) <sub>2</sub> ] <sub>n</sub>                                                                                                           | $2.90 \times 10^{-4} \text{ S m}^{-1}$  | 1                 |
| Cd(adc)(4-phpy) <sub>2</sub> (H <sub>2</sub> O) <sub>2</sub> ] <sub>n</sub>                                                                           | $1.53 \times 10^{-7} \text{ S cm}^{-1}$ | 2                 |
| Cd(adc)(4-phpy) <sub>2</sub> (H <sub>2</sub> O) <sub>2</sub> ] <sub>n</sub>                                                                           | $5.90 \times 10^{-8} \text{ S cm}^{-1}$ | 2                 |
| [Cd(3-bpd)(SCN) <sub>2</sub> ] <sub>n</sub>                                                                                                           | $4.53 \times 10^{-7} \text{ S cm}^{-1}$ | 3                 |
| [Zn <sub>2</sub> (DPBEIH)(H <sub>2</sub> O) <sub>2</sub> ] <sub>n</sub>                                                                               | $8.42 \times 10^{-7} \text{ S m}^{-1}$  | 4                 |
| [Cd <sub>2</sub> (DPBEIH)(H <sub>2</sub> O) <sub>2</sub> ] <sub>n</sub>                                                                               | $5.04 \times 10^{-6} \text{ S m}^{-1}$  | 4                 |
| [Zn <sub>6</sub> (bpd) <sub>3</sub> ( <i>p</i> -clba) <sub>6</sub> ( $\mu_3$ -OH) <sub>4</sub> ]·( <i>p</i> -clba) <sub>2</sub> ·(CH <sub>3</sub> OH) | $3.29 \times 10^{-4} \text{ S m}^{-1}$  | Compound <b>1</b> |
| [Zn <sub>6</sub> (bpd) <sub>3</sub> ( <i>p</i> -brba) <sub>6</sub> ( $\mu_3$ -OH) <sub>4</sub> ]·( <i>p</i> -brba) <sub>2</sub> ·(CH <sub>3</sub> OH) | $2.22 \times 10^{-4} \text{ S m}^{-1}$  | Compound <b>2</b> |

## References

1. S. Halder, A. Dey, A. Bhattacharjee, J. Ortega-Castro, A. Frontera, P. P. Ray and P. Roy, *Dalton Trans.*, 2017, **46**, 11239–11249
2. F. Ahmed, J. Datta, B. Dutta, K. Naskar, C. Sinha, S. M. Alam, S. Kundu, P. P. Ray and M. H. Mir, *RSC Adv.* 2017, **7**, 10369–10375.
3. S. Halder, A. Lyek, K. Ghosh, C. Rizzoli, P. P. Ray and P. Roy, *Dalton Trans.* 2015, **44**, 16149–16155.
4. J. T. Makode, A. R. Yaul, S. G. Bhadange and A. S. Aswar, *Russ. J. Inorg. Chem.* 2009, **54**, 1372–1377.
